# Supplementary material for: A Missense Variant in the Bardet-Biedl Syndrome 2 Gene (BBS2) Leads to a Novel Syndromic Retinal Degeneration in the Shetland Sheepdog
Source: MDPI journal article supplement (doi:10.3390/genes12111771), 2021-11-08
Supplement: s1 [file s1]

## SUPPLEMENTARY FILES

**Table S2:** In-house effect scores assigned to sequence ontology terms used to prioritise variant filtration in whole genome sequencing analysis.

| Sequence ontology term                                | Effect Score | Sequence ontology term                           | Effect Score |
|-------------------------------------------------------|--------------|--------------------------------------------------|--------------|
| 5'-UTR premature start codon gain variant             | 5            | 3 prime UTR variant                              | 2            |
| Chromosome number variation                           | 5            | 5 prime UTR variant                              | 2            |
| Disruptive in-frame deletion                          | 5            | Exon variant                                     | 2            |
| Disruptive in-frame insertion                         | 5            | Feature elongation                               | 2            |
| Exon loss                                             | 5            | Feature truncation                               | 2            |
| Exon loss variant                                     | 5            | Gene variant                                     | 2            |
| Frameshift variant                                    | 5            | Intron variant                                   | 2            |
| In-frame deletion                                     | 5            | Mature microRNA (miRNA) variant                  | 2            |
| In-frame insertion                                    | 5            | miRNA                                            | 2            |
| Initiator codon variant                               | 5            | Nonsense mediated decay (NMD) transcript variant | 2            |
| Initiator codon variant and non-canonical start codon | 5            | Non-coding transcript exon variant               | 2            |
| Missense variant                                      | 5            | Non-coding transcript variant                    | 2            |
| Protein altering variant                              | 5            | Regulatory region amplification                  | 2            |
| Rare amino acid variant                               | 5            | Regulatory region variant                        | 2            |
| Splice acceptor variant                               | 5            | Start retained                                   | 2            |
| Splice donor variant                                  | 5            | Stop retained variant                            | 2            |
| Start lost                                            | 5            | TFBS variant                                     | 2            |
| Stop gained                                           | 5            | TFBS amplification                               | 2            |
| Stop lost                                             | 5            | Transcript amplification                         | 2            |
| Transcript ablation                                   | 5            | Transcript variant                               | 2            |
| 3'-UTR truncation                                     | 4            | Upstream gene variant                            | 2            |
| 5'-UTR truncation                                     | 4            | Coding sequence variant                          | 1            |
| Non-coding exon variant                               | 4            | Downstream gene variant                          | 1            |
| Regulatory region ablation                            | 4            | Intergenic region                                | 1            |
| Splice region variant                                 | 4            | Intergenic variant                               | 1            |
| TFBS ablation                                         | 4            | Intragenic variant                               | 1            |
| Coding sequence variant                               | 3            | Synonymous variant                               | 1            |
| Conserved intergenic variant                          | 3            | Transcript                                       | 1            |
| Conserved intron variant                              | 3            |                                                  |              |

**Table S3:** A list of twelve variants homozygous in the affected dog that remained after filtering out non-common variants using the DBVDC. An asterisks (\*) highlights those variants overlapping with the 15 variants in the final filtering list following candidate gene analysis in Table S4.

| Variant | CanFam3.1<br>Chromosomal<br>Position | Gene/Ensembl Stable<br>Identifier                          | Variant        | In-<br>house<br>effect<br>score | SIFT score                           |
|---------|--------------------------------------|------------------------------------------------------------|----------------|---------------------------------|--------------------------------------|
| V1*     | 2:59693737                           | <i>BBS2</i>                                                | Missense SNV   | 5                               | Deleterious (0.03)                   |
| V2*     | X:43769675                           | <i>BMP15</i>                                               | Missense SNV   | 5                               | Deleterious (0.01)                   |
| V3      | 11:12969395                          | ENSCAFG00000012222<br>(human orthologue<br><i>EEF1A1</i> ) | 15-bp deletion | 5                               | None                                 |
| V4*     | 30:24115675                          | ENSCAFG00000016650<br>(human orthologue<br><i>PSMA1</i> )  | Missense SNV   | 5                               | Deleterious (0)                      |
| V5      | 10:17263700                          | ENSCAFG00000028547<br>(no human orthologue)                | 3-bp deletion  | 5                               | None                                 |
| V6      | 18:40776257                          | ENSCAFG00000029824<br>(no human orthologue)                | Missense SNV   | 5                               | Deleterious (0.04)                   |
| V7      | 15:13802173                          | ENSCAFG00000031689<br>(no human orthologue)                | Missense SNV   | 5                               | None                                 |
| V8      | 38:23457534                          | ENSCAFG00000031841<br>(no human orthologue)                | 3-bp insertion | 5                               | None                                 |
| V9      | 17:4745695                           | ENSCAFG00000038172<br>(no human orthologue)                | 2-bp insertion | 4                               | None                                 |
| V10     | 4:5245679                            | <i>IRF2BP2</i>                                             | Missense SNV   | 5                               | Tolerated low confidence<br>(0.18)   |
| V11*    | X:1762952                            | <i>MXRA5</i>                                               | Missense SNV   | 5                               | Deleterious (0.04)                   |
| V12     | 17:40080783                          | <i>TRABD2A</i>                                             | Missense SNV   | 5                               | Deleterious_low<br>confidence (0.05) |

**Table S4:** Fourteen variants identified through WGS filtering to exclude in a SS cohort. Filtering variants from WGS analysis identified 14 variants to follow up in additional SS controls. One of these variants is located in a gene associated with a retinal phenotype in humans, marked by an asterisk (\*). Variants were checked for in genomes in the Dog Biomedical Variant Database Consortium (DBVDC) genome bank in addition to sequencing in 43 SS controls aged 8 years or older, and were excluded as variants of interest if homozygous in at least one control SS. Variants with low confidence in sequencing reads due to low coverage or those where control dogs were only heterozygous or homozygous for the alternate allele were not excluded as potential candidate variants.

| Variant | CanFam3.1<br>Chromosomal<br>Position | Gene/Ensembl Stable<br>Identifier                         | Variant                                                | Excluded by<br>screening<br>DBVDC | Excluded by<br>screening 43<br>control SS |
|---------|--------------------------------------|-----------------------------------------------------------|--------------------------------------------------------|-----------------------------------|-------------------------------------------|
| V1      | 1: 110147994                         | <i>CD3EAP</i>                                             | Missense SNV                                           | Not excluded                      | Excluded                                  |
| V2      | 1: 116038553                         | ENSCAFG00000028805<br>(no human orthologue)               | Missense SNV                                           | Not excluded                      | Excluded                                  |
| V3      | 1: 119547008                         | <i>ZNF507</i>                                             | 1-bp deletion                                          | Not excluded                      | Excluded                                  |
| V4      | 2: 62484625                          | <i>CHD9</i>                                               | Missense SNV                                           | Not excluded                      | Excluded                                  |
| V5      | 15: 52265347                         | <i>FGG</i>                                                | Splice site<br>insertion of<br>transposable<br>element | Not excluded                      | Excluded                                  |
| V6      | 16: 36561913                         | <i>DLC1</i>                                               | Missense SNV                                           | Not excluded                      | Excluded                                  |
| V7      | 16: 44477295                         | <i>F11</i>                                                | Splice site<br>SNV                                     | Not excluded                      | Excluded                                  |
| V8      | 30: 24115675                         | ENSCAFG00000016650<br>(human orthologue<br><i>PSMA1</i> ) | Missense SNV                                           | Not excluded                      | Excluded                                  |
| V9      | 36: 10135919                         | <i>SLC38A11</i>                                           | Missense SNV                                           | Not excluded                      | Excluded                                  |
| V10     | X: 1762952                           | <i>MXRA5</i>                                              | Missense SNV                                           | Not excluded                      | Excluded                                  |
| V11     | X: 43769675                          | <i>BMP15</i>                                              | Missense SNV                                           | Not excluded                      | Excluded                                  |
| V12     | 4: 68451901                          | <i>C7</i>                                                 | Nonsense<br>SNV                                        | Not excluded                      | Not excluded                              |
| V13     | 22: 58226397                         | <i>IRS2</i>                                               | 3-bp insertion                                         | Not Excluded                      | Not excluded                              |
| V14     | 2: 59693737                          | <i>BBS2*</i>                                              | Missense SNV                                           | Not excluded                      | Not excluded                              |

|  |  |
|--|--|
|  |  |
|--|--|

|  |  |
|--|--|
|  |  |
|--|--|

|  |  |
|--|--|
|  |  |
|--|--|

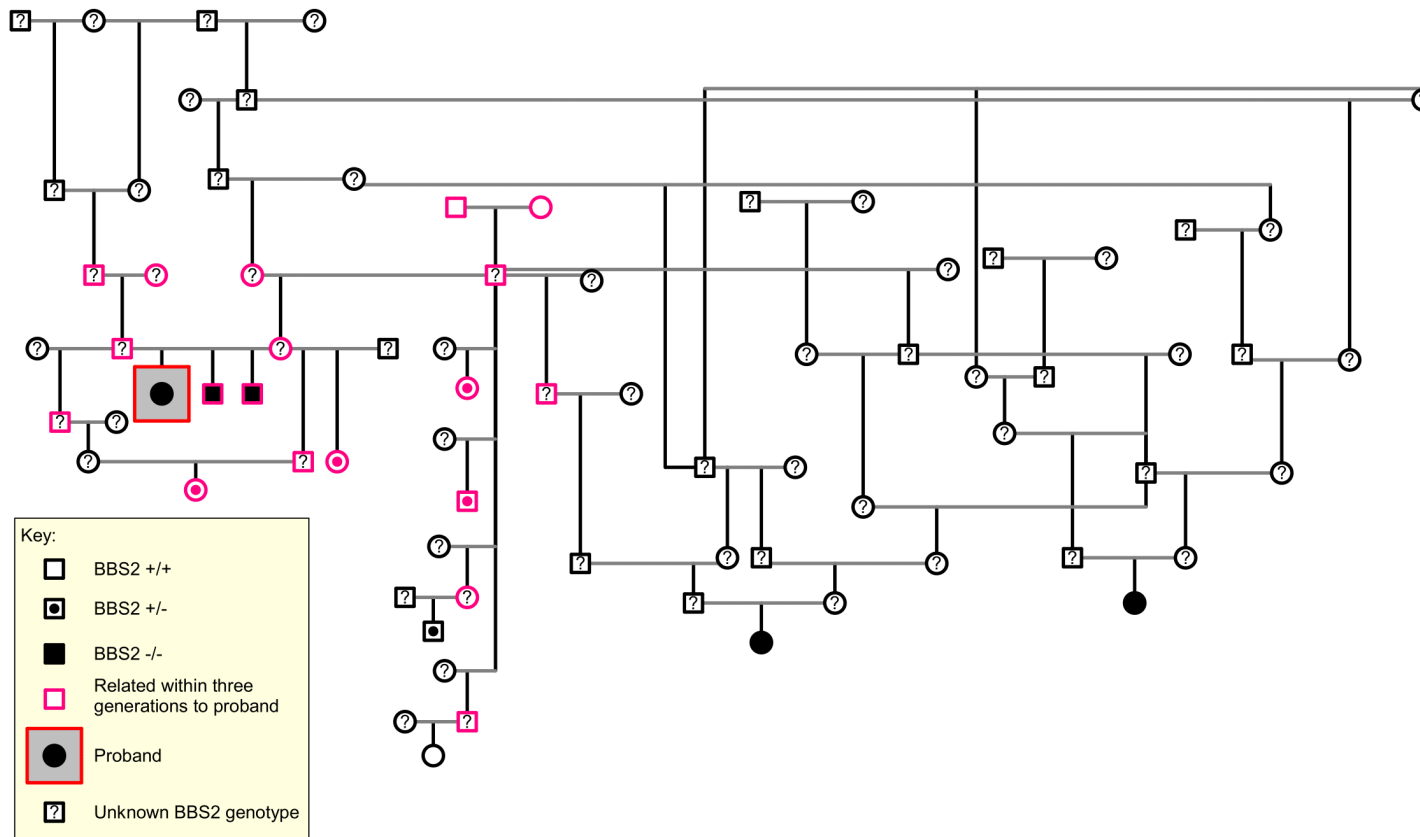

**Figure S1:** Pedigree drawing of proband SS1 shows there is shared ancestry between five *BBS2* c.1222G>C homozygotes. Male dogs are shown as a square symbol and females as a circle symbol. Individuals coloured pink are related within three generations to the proband SS1.

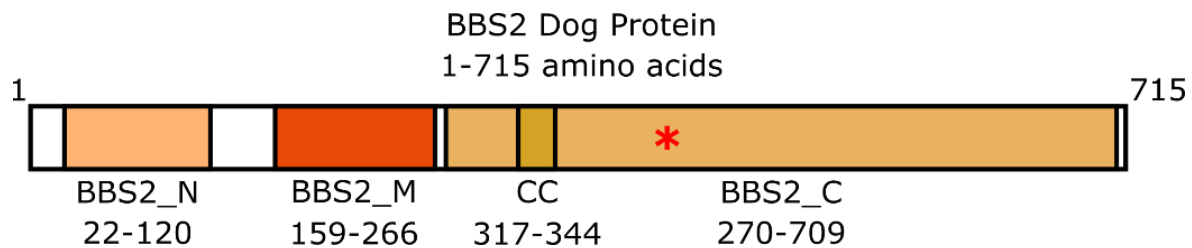

**Figure S2:** A schematic of the canine BBS2 protein. The N-terminal (BBS2\_N) is positioned between amino acid residues 22-120. The middle region domain (BBS2\_M) is located between amino acids 159-266. The C-terminal (BBS2\_C) resides between amino acids 270-709 with a putative coiled-coil domain (CC) from 317-344 amino acids. The BBS2 candidate SNV affects amino acid position 408, as highlighted by a red asterisk.

List of keywords associated with progressive retinal atrophy (PRA). Retina, progressive retinal atrophy, retinitis pigmentosa, rod-cone dysplasia/rod cone dysplasia, cone-rod dysplasia/cone rod dysplasia, cone degeneration, retinal degeneration, rod dysplasia, photoreceptor, retinal dystrophy, retinal pigment epithelium, nyctalopia, bone spicules, fundus, blindness, Leber congenital amaurosis, Bardet-Biedl syndrome/Bardet Biedl syndrome, chorioretinal atrophy, chorioretinal degeneration, cone dystrophy, cone-rod dystrophy/cone rod dystrophy, rod-cone dystrophy/rod cone dystrophy, congenital stationary night blindness, macular degeneration, ocular-retinal developmental disease/ocular retinal developmental disease, optic atrophy, Usher syndrome, retinopathy, cilium, ciliopathy.
